# Supplementary material for: Gene essentiality prediction based on fractal features and machine learning
Source: Royal Society of Chemistry journal article supplement (doi:10.1039/c6mb00806b), 2017-02-01
Supplement: c6mb00806b1.pdf [file c6mb00806b1.pdf]

### ***Information dimension of gene CGR representation***

Information dimension is an index for characterizing fractal patterns or sets by quantifying their complexity as a ratio of the change in detail to the change in scale<sup>21</sup>. We divide the CGR pattern into  $\varepsilon^2$  square grids of equal size, and then the side length of each grid is  $1/\varepsilon$ . The numbers of non-empty grids are labeled by  $Z(\varepsilon)$ . Dividing the number of points falling in the  $i$ -th grid by the total point number in the CGR square yields a probability  $p_i$  for the  $i$ -th grid. Information function and information dimension for the CGR are respectively defined as

$$I(\varepsilon) = -\sum_{i=1}^{Z(\varepsilon)} p_i \log p_i \quad (5)$$

$$D_I = \lim_{1/\varepsilon \rightarrow 0} \frac{I(\varepsilon)}{\log(1/\varepsilon)} \quad (6)$$

The information function  $I(\varepsilon)$  during a range of  $\log(1/\varepsilon)$  has a scaling region. The information dimension  $D_I$  can be obtained from the slope in the scaling region.

### ***Hurst exponent of gene time series***

The Hurst exponent is the measure of the smoothness of fractal time series based on the asymptotic behavior of the rescaled range of the process<sup>22</sup>. In this study, rescaled range (R/S) analysis, a statistical method is developed to estimate the Hurst exponent of the times series of gene sequence. It involved the following basic steps. For a given gene sequence  $x(s)$ ,  $F$  is a transformed times series over a total duration  $N$ . for a deterministic integer  $\tau$ , the cumulative total at each point in times is defined as

$$\Gamma_{\tau,k} = \sum_{i=1}^k (F_i - \mu_\tau) \quad 0 < k \leq \tau \quad (7)$$

Where,  $F_i$  is the value of the time series at time  $i$ ,  $\mu_\tau$  is the mean over the whole data set given by

$$\mu_\tau = \left(\frac{1}{\tau}\right) \sum_{i=1}^{\tau} F_i \quad (8)$$

The range  $R$  of given by

$$R_\tau = \text{Max}(\Gamma_{\tau,k}) - \text{Min}(\Gamma_{\tau,k}) \quad (9)$$

The standard deviation of the values over the whole data set is given

$$S_\tau = \sqrt{\left(\frac{1}{\tau}\right) \sum_{i=1}^{\tau} (F_i - \mu_\tau)^2} \quad (10)$$

The rescale range is given by  $R/S$ . The Hurst exponent is estimated by plotting the values of  $\log(R/S)$  versus  $\log \tau$ . The slope of the best fitting line gives the estimate of the Hurst exponent.

### ***Topological entropy of gene sequences***

Topological entropy is a measure of complex regulation of a gene sequence. For a given gene sequence  $x(s)$ ,  $N$  corresponds to the length of  $x(s)$  and  $n$  is defined as a unique integer by the following equation,

$$4^n + n - 1 \leq N < 4^{n+1} + (n+1) - 1 \quad (1)$$

Based on deferent  $n$ , the complexity function  $C_x$  is defined as:

$$C_x(n) = \left| \{m : |m| = n \text{ and } m \text{ appears as a subword of } x\} \right| \quad (2)$$

Where,  $C_x$  represents the number of different  $n$ -length sub-words (overlaps allowed) that appear in  $x(s)$ .

Then for  $x^{4^n+n-1}$  the first  $4^n + n - 1$  letters of  $x$ , the definition of topological entropy of the finite sequence is

$$H_{top}(x) = \frac{\log_4 \left( C_{x^{4^n+n-1}}(n) \right)}{n} \quad (3)$$

Where,  $H_{top}(x)$  is the topological entropy of  $x(s)$ .
